# Supplementary material for: Morphologic and Clinical Outcome of Intracranial Aneurysms after Treatment Using Flow Diverter Devices: Mid-Term Follow-Up
Source: Hindawi journal article supplement (doi:10.1155/2016/2187275), 2016-01-01
Supplement: f1 [file 2187275.f1.pdf]

## Supplementary material showing patients' characteristics and results in detail

| Pat. No. | Age | Sex | Initial Symptoms                         | Aneurysma (location, diameter mm) | Specifics                                            | Complications                      | OKM  | Treatment Effects |
|----------|-----|-----|------------------------------------------|-----------------------------------|------------------------------------------------------|------------------------------------|------|-------------------|
| 1        | 55  | f   | Left oculomotor nerve palsy              | ICA left, 15                      | none                                                 | none                               | D    | 1                 |
| 2        | 8   | m   | Headache                                 | BA, 26                            | IV                                                   | none                               | D    | 2                 |
| 3        | 39  | m   | Dizziness, headache                      | VA left, 11                       | none                                                 | none                               | D    | 1                 |
| 4        | 51  | f   | SAH                                      | BA, 20                            | Recurrence after stent-assisted coiling              | none                               | C    | 2                 |
| 5        | 75  | f   | Right abducens nerve palsy               | ICA right, 13                     | none                                                 | none                               | D    | 1                 |
| 6        | 54  | f   | Incidental finding                       | BA, 8                             | Coiling, PTA, Reopro®                                | Cerebellar Ischemia                | D    | n.a.              |
| 7        | 59  | f   | Left oculomotor nerve palsy              | ICA left, 19                      | PTA, Stent in the course                             | Stenosis                           | C    | 2                 |
| 8        | 39  | f   | SAH                                      | ICA left, 3                       | Recurrence after clipping and stent-assisted coiling | none                               | C    | 2                 |
| 9        | 43  | m   | TIA                                      | ICA left, 4                       | PTA, Reopro®, IV                                     | none                               | D    | 1                 |
| 10       | 62  | f   | Right oculomotor nerve palsy             | ICA right, 12                     | none                                                 | none                               | D    | 1                 |
| 11       | 61  | f   | Incidental finding                       | MCA right, 8                      | none                                                 | Stenosis                           | D    | n.a.              |
| 12       | 60  | f   | Optical nerve palsy                      | ICA left, 21                      | 2 FDs during the same session                        | none                               | n.a. | 3                 |
| 13       | 52  | f   | Right sensual trigeminal nerve palsy     | ICA right, 23                     | none                                                 | none                               | D    | 1                 |
| 14       | 61  | f   | Right optic and oculomotor nerve palsy   | ICA right, 16                     | PTA, Second FD in the course                         | Endoleak                           | D    | 2                 |
| 15       | 56  | f   | Right optic and oculomotor nerve palsy   | ICA right, 22                     | 2 FDs during the same session                        | none                               | n.a. | 3                 |
| 16       | 52  | m   | SAH                                      | VA right, 3                       | 2 FDs during the same session                        | none                               | D    | 1                 |
| 17       | 60  | f   | Left oculomotor and abducens nerve palsy | ICA left, 11                      | none                                                 | Endoleak                           | D    | 2                 |
| 18       | 52  | f   | SAH                                      | ICA left, 4                       | none                                                 | none                               | D    | 1                 |
| 19       | 54  | f   | Left optic and oculomotor nerve palsy    | ICA left, 12                      | Second FD in the course, IV                          | ICB right during second FD session | B    | 4                 |
| 20       | 54  | f   | Frontal lobe disorder                    | ICA right, 16                     | IV                                                   | none                               | D    | 1                 |
| 21       | 83  | f   | Optic and left abducens nerve palsy      | ICA left, 16                      | PTA                                                  | none                               | A    | 3                 |
| 22       | 55  | m   | SAH                                      | BA, 6                             | IV                                                   | Vascular obliteration              | D    | 1                 |
| 23       | 50  | f   | SAH                                      | ICA left, 4                       | Second FD in the course                              | none                               | D    | 1                 |
| 24       | 22  | f   | Left glossopharyngeal nerve palsy        | ICA left, 16                      | none                                                 | none                               | D    | 1                 |
| 25       | 44  | m   | Incidental finding                       | ICA left, 5                       | none                                                 | Stenosis                           | D    | n.a.              |
| 26       | 63  | f   | SAH after FD ex domo                     | ICA right, 6                      | PTA                                                  | Stenosis                           | D    | 2                 |
| 27       | 71  | f   | Dizziness                                | VA right, 11                      | PTA                                                  | none                               | C    | 2                 |
| 28       | 70  | f   | Incidental finding                       | VA left, 5                        | none                                                 | Vascular obliteration              | D    | n.a.              |

The supplementary table shows all patients including clinical symptoms, aneurysm size, and location as well as treatment effects. We used the O’Kelly-Marotta grading scale (OKM), which classifies aneurysm filling in: A – complete (>95%); B – incomplete (5-95%); C – neck remnant (<5%) or D – no filling (0%), the bold character **D** was used for OKM D within the first 3 months after treatment. OKM was not applicable (n.a.) in two patients who did not undergo digital subtraction angiography in the follow-up. The clinical treatment effect was rated on a four level scale (1 – improvement, 2 – delayed improvement, 3 – no improvement, 4 – fatal outcome) and was not applicable (n.a.) in asymptomatic patients with incidental aneurysm. BA – basilar artery, ICA – internal carotid artery, MCA – medial carotid artery, PTA – percutaneous transluminal angioplasty, SAH – subarachnoid hemorrhage, TIA – transient ischemic attack, VA – vertebral artery, **IV – incorporated vessel**
